# Supplementary material
Source: PubMed Central journal article supplement (PMC2708707)
Supplement: 0904505106_0904505106SI.pdf [file 0904505106_0904505106SI.pdf]

# Supporting Information

Silva et al. 10.1073/pnas.0904505106

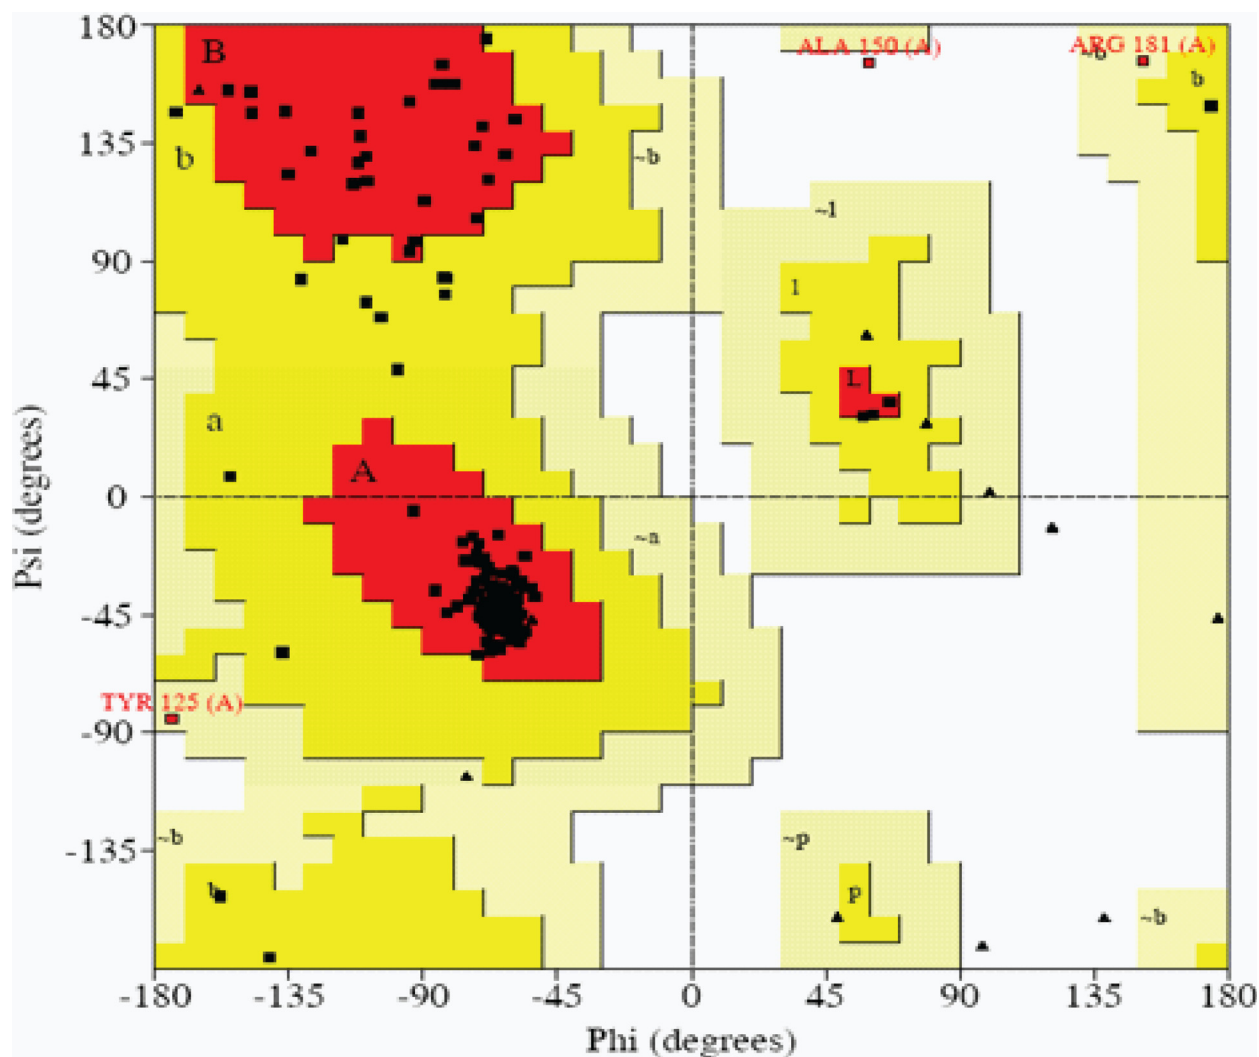

**Fig. S1.** Ramachandran plot. Red regions are highly favored in terms of steric interactions, yellow regions are allowed, white regions are unfavored. Triangles are glycine residues (unrestricted by  $\varphi$  and  $\psi$  because of lack of a side chain), all other residues are indicated by squares. Residues in disallowed regions, by the steric criteria, are in red.

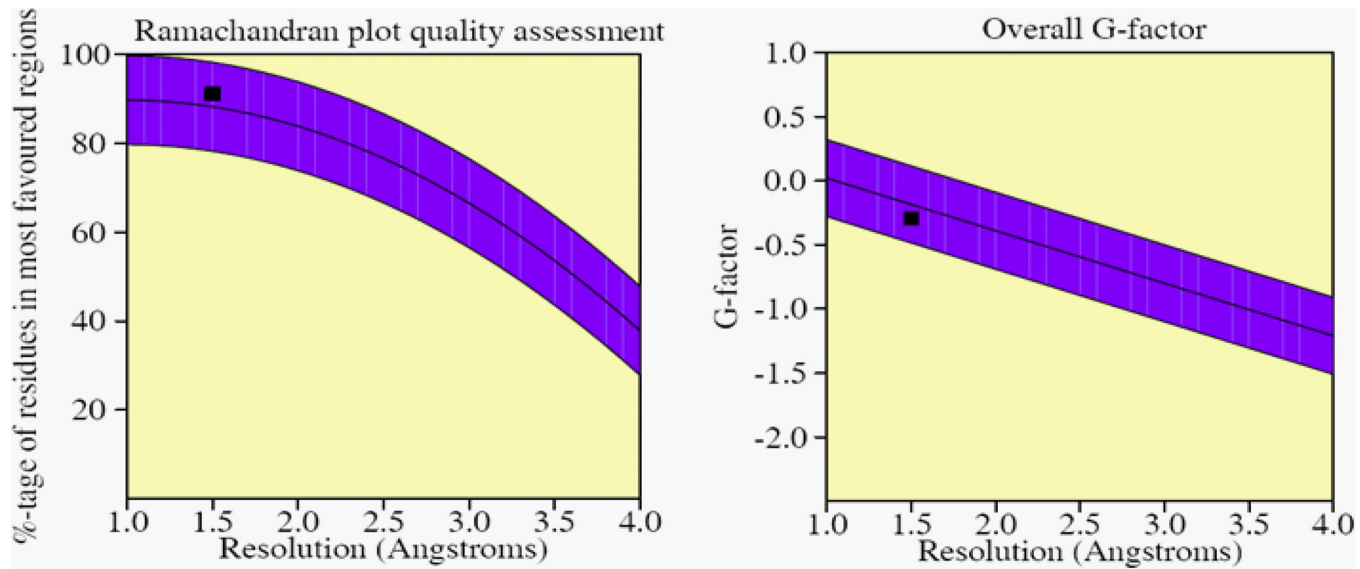

**Fig. S2.** Procheck assessment. Comparison of Ramachandran plot and G-factor to known structures. For the Ramachandran plot, as the crystal becomes better resolved more residues tend to be found in the favored regions (90% in the highest resolution structures), which is what we observe. The G-factor is a similar comparison, but includes many more criteria such as the angles of the side chains for each residue, bond lengths and planarity (2).



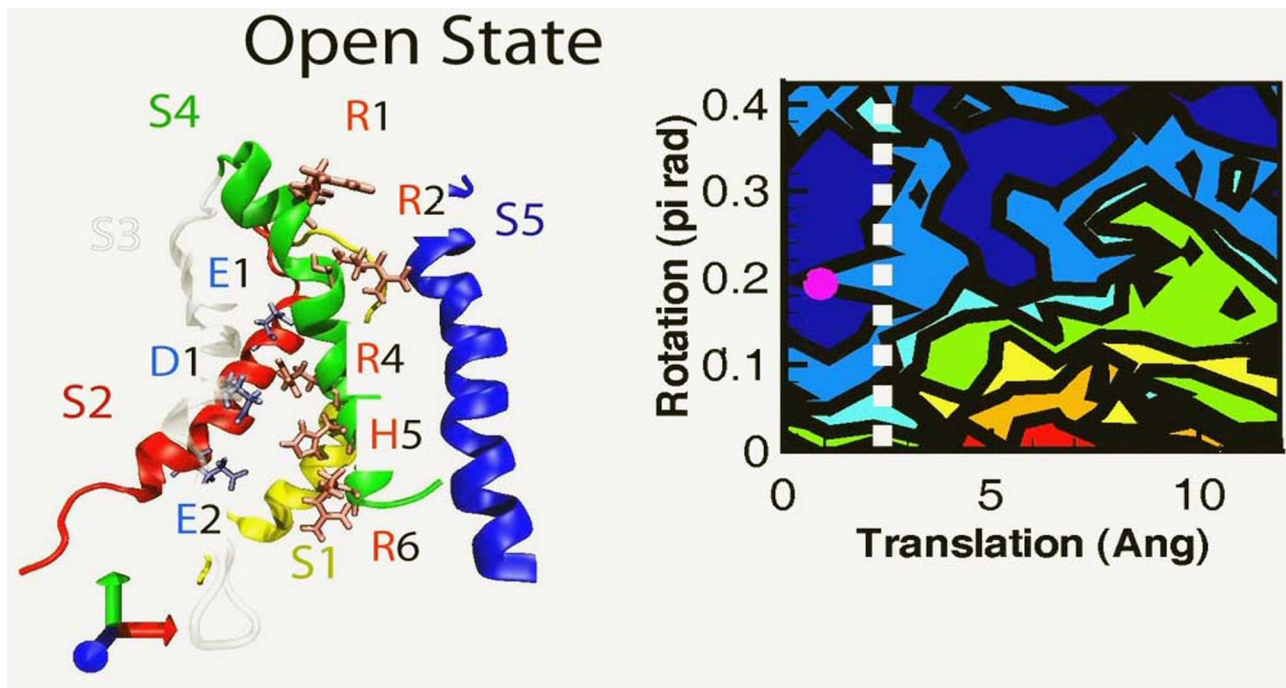

**Movie S1.** Movie shows S4 movement through the energy landscape from open to closed. At stable conformation (open, intermediate, closed, deep closed) the protein is rotated showing 3D structure.

[Movie S1 \(AVI\)](#)

## Other Supporting Information Files

[SI Appendix \(PDF\)](#)
